# Supplementary material
Source: publisher site journal article supplement (https://www.dovepress.com/article/226327)
Supplement: Supplementary file 1 [file get_supplementary_file.php]

## Protocol:

# Intensive Weight Management Programme (IWMP)

### Outline:

The Bariatric Medicine & Surgery (BMS) service in Galway University hospital provides a multidisciplinary team (MDT) approach for the management of severe obesity (BMI >40kg/m<sup>2</sup>).

There are a variety of interventions that are open to patients attending the service including a diet & physical activity programme (CROI CLANN) as well as Bariatric surgery for suitable candidates; however these do not meet the needs of all patients. The aim of this intervention is to support patients in the improvement of medical risk factors through an intensive weight management programme over a period of 24 weeks.

This document outlines the standard operating procedures underlying the roles of the multidisciplinary team, which consists of consultant/registrar, obesity CNS & dietitian responsible for the management of the BMS service.

### Definitions and abbreviations:

- Bariatric Medicine & Surgery (BMS)
- Galway University Hospital (GUH)
- Multidisciplinary Team (MDT)
- Body Mass Index (BMI)

### General protocol overview:

#### *Initial medical assessment*

- Baseline bloods taken include, but are not restricted to: Urea & electrolytes, liver function tests (LFT), renal profile (RP), bone profile, fasting glucose, HbA1c, thyroid function tests (TFT), full blood count (FBC), fasting lipids, vitamin B<sub>12</sub>, folate
- Patient is commenced on other medication as appropriate (e.g. anti-hypertensives, nicotine patches).
- The need for oral hypoglycaemic agents or insulin in patients with Type 2 diabetes is monitored. As a general guide insulin sensitisers (e.g. metformin) may be continued. However if the patient is currently taking sulphonylureas (e.g. diamicron MR), insulin secretagogues (e.g. replaglanide) or insulin, the dose should be reduced by 50% as soon as the patient commences the liquid low calorie diet. Blood glucose should then be monitored pre-meal and at bedtime (qds) for 3 days with a view to discontinuing these medications if any blood sugars are  $\leq 5$ mmol/L. *Note:* it is not unusual for insulin doses in excess of 100u per day to be discontinued in these patients once the liquid low calorie diet regime has begun.
- Referral to other clinical teams is made as appropriate e.g. cardiology, surgical.

### Dietary strategy: meals and supplementation:

- Patient is commenced on low calorie milk based diet (see Appendix 3). Other food based options (a conventional calorie controlled diet) may be considered if the milk diet is not tolerated by individuals.
- Nutritional supplements are advised to ensure the liquid low calorie diet is nutritionally complete, which are:
  1. Multi-vitamin (Sona Balance, Sona Multiplus or Boots A-Z multivitamin & mineral) – once daily
  2. Omega 3,6,9 fatty acids (Omecor) – once daily
- In addition patients are recommended to drink a salty drink daily (e.g. Stock cube or ½ teaspoon salt in water) to meet sodium requirements
- Patients are also commenced on a bulking laxative (e.g. Fybogel) in an effort to prevent constipation. If patients are already on laxative therapy, this should be continued.

### Programme inclusion criteria and specifications:

- Of note, all cases being considered for commencement are discussed by the Bariatric MDT.
- BMI >35 kg/m<sup>2</sup>
- A maximum of three patients may be commenced on the milk diet at each bi-weekly clinic.

### *Exclusion criteria:*

- Age <18 or >75 years
- Pregnancy or breastfeeding
- Significant renal disease
- Significant cardiac disease
- Recent MI or CVA
- Uncontrolled hypothyroidism
- Significant learning difficulties
- Significant psychiatric disorders
- Inability to commit to clinic visit schedule
- Inability to tolerate milk

### Initiation of IMWP: procedures:

- Body weight, height, blood pressure, baseline ECG recorded.
- Full history and physical examination by medical team, CNS & Dietitian, including a comprehensive nutrition history.
- Programme protocol discussed with patient, including potential risks and benefits.
- Nutritional requirements calculated and a dietary regimen is devised for the patient by dietitian.
- Coping strategies and distraction techniques with respect to hunger are discussed with the patient prior to initiation. Written information is provided.

- Weight loss goals and time frames are discussed with the patient.
- Baseline blood tests taken.
- Smoking cessation advice and resources given, when appropriate.

Ongoing monitoring (weight loss phase – weeks 1 to 8):

- Patient on low-calorie milk-based diet only, as described below.
- Fortnightly visits to clinic, with body weight and blood pressure monitoring.
- Medication reviewed by medical team.
- Patient is reviewed by the Dietitian.
- The weight loss phase is used as an opportunity to provide education on various topics such as:
  - Record keeping
  - Physical activity
  - Environmental control
  - Food labelling
  - Calories in foods
  - Healthy eating
  - Weight loss maintenance
- Blood test taken, which include (but are not restricted to) urea & electrolytes, LFT, renal profile, FBC, TFT's, lipid profile, HbA1c.

Food reintroduction phase (weeks 8 to 16):

**Weeks 1 & 2:** Patients are asked to include a meal (dinner) consisting of a specific quantity of a protein food as well as a specific quantity of vegetables. This meal should be weighed using a digital food scales. The milk volume allocation should be reduced accordingly. The protein requirements of the patient should continue to be met by the diet. Monitoring should otherwise continue as in phase 1.

**Weeks 3 & 4:** Patients are asked to include 2 meals per day (lunch & dinner) consisting of 2 portions of protein foods, 4 portions of vegetables and 2 portions of carbohydrate foods. All foods should continue to be weighed. The milk volume is reduced substantially at this stage. Monitoring should otherwise continue as in phase 1.

**Weeks 5 & 6:** Patients are asked to include 3 meals per day (breakfast, lunch & dinner). Individual preferences should be taken into account. Again milk volume should be reduced as appropriate. Monitoring should otherwise continue as in phase 1.

**Weeks 7 & 8:** Patients can introduce some low calorie snacks into their diet. The full food reintroduction phase is now complete. Milk can continue to be included within healthy eating guidelines. At this stage a healthy eating regimen should be established in line with healthy eating guidelines. Monitoring should otherwise continue as in phase 1.

Weight maintenance phase (week 16-24):

- Patients continue to attend every 2 weeks.
- Monitoring continues as per phase 1 & 2.
- Issues such as relapse management, planning meals in advance, managing difficult meal timing and goal setting. Self-monitoring is vital at this stage and participants are encouraged to continue this practice on discharge.

Ongoing Support:

On completion of the IWMP, patients are followed up to ensure continued support and to aid with relapse management. Upon completion they are offered follow up appointments after 8 weeks, 16 weeks, 24weeks and afterwards if requested.

Premature discharge of participant from IWMP:

- Self-discharge
- Not tolerating milk volume
- Adverse effects as a results of programme
- Non-compliance with milk/laxatives/multivitamins
- Multiple lapses resulting in participants consuming excess calories
- Non-attendance at appointments
- On instruction from medical team

**Low calorie milk-based diet outline:**

| Time | Allowance                                                                              |
|------|----------------------------------------------------------------------------------------|
| 8am  | 325ml semi-skimmed milk                                                                |
| 10am | 325ml semi-skimmed milk                                                                |
| 12pm | 325ml semi-skimmed milk                                                                |
| 2pm  | Either: 1 stock cube in a glass of water or 1 small sachet of salt in a glass of water |
| 3pm  | 325ml semi-skimmed milk                                                                |
| 6pm  | 325ml semi-skimmed milk                                                                |
| 8pm  | 325ml semi-skimmed milk                                                                |
| 10pm | 325ml semi-skimmed milk                                                                |

**Supplements:**

- Centrum Advance or Boots A-Z multivitamin (one a day)
- Omega 3,6,9 supplement.
- Fybogel 1-2sachets per day.

**Notes:**

- Unrestricted: Water, Tea, Coffee (no sugar; milk used from allowance above)
- Maximum 500mls “diet” minerals.

Summary:

| Daily dietary intake | Quantity  | Electrolytes | Quantity |
|----------------------|-----------|--------------|----------|
| Fluid volume         | 2275 ml   | Sodium       | 53 mmol  |
| Energy               | 1045 kcal | Potassium    | 87 mmol  |
| Protein              | 75 g      | Calcium      | 68 mmol  |
| Fat                  | 36 g      |              |          |
| Carbohydrate         | 113 g     |              |          |

**Nutritional intervention details:**

*Composition of the milk based low calorie diet (Luton & Dunstable hospital low calorie liquid diet)*

|              | 2272 ml<br>(4 pints) Semi-skimmed milk | SonaBalance or Boots A-Z multivitamin (1 dose) | Total          | Irish RDA 1999 (18-64yr) |         |
|--------------|----------------------------------------|------------------------------------------------|----------------|--------------------------|---------|
|              |                                        |                                                |                | Male                     | Female  |
| Energy       | 1045 kcal                              | 0 kcal                                         | 1045 kcal      |                          |         |
| Protein      | 75g                                    | 0 g                                            | 75 g           | 0.75g/kg/day             |         |
| Fat          | 36g                                    | 0 g                                            | 36 g           |                          |         |
| n-6 PUFA     | Trace                                  | 0                                              |                | 2 % of dietary energy    |         |
| n-3 PUFA     | Trace                                  | 0                                              |                | 0.5% of dietary energy   |         |
| Carbohydrate | 113g                                   | 0 g                                            | 113g           |                          |         |
| Sodium       | 53 mmol                                | 0 mmol                                         | 53 mmol        |                          |         |
| Potassium    | 87 mmol                                | 0                                              | 87 mmol        | 79 mmol                  | 79 mmol |
| Calcium      | 2726 mg                                | 162 /200mg                                     | mg             | 800 mg                   | 800 mg  |
| Magnesium    | 272 mg                                 | 100 /60mg                                      | 372/332 mg     |                          |         |
| Phosphorus   | 2135 mg                                | 109 /0mg                                       | mg             | 550 mg                   | 550 mg  |
| Iron         | 1.36 mg                                | 18 /14mg                                       | mg             | 10 mg                    | 14 mg   |
| Zinc         | 9 mg                                   | 15 /10mg                                       | 24 /19mg       | 9.5 mg                   | 7 mg    |
| Vitamin D    | 22.7 ug                                | 10/5 ug                                        | 32.7/27.7 ug   | 0-10 ug                  | 0-10 ug |
| Vitamin K    |                                        | 25/75ug                                        | 25/75 ug       |                          |         |
| Vitamin A    |                                        | 1050 /400ug                                    | 1050/400ug     |                          |         |
| Vitamin E    | 68 mg                                  | 30/12 mg                                       | 98/80 mg       |                          |         |
| Vitamin C    | 22.7 mg                                | 60/80 mg                                       | 82.7/102.7mg   | 60 mg                    | 60 mg   |
| Vitamin B6   | 1.36 mg                                | 2/1.4 mg                                       | 3.36/2.76 mg   | 15 ug / g protein        |         |
| Thiamine     | 0.9 mg                                 | 1.5 /1.1mg                                     | 2.4/2 mg       | 100 ug / MJ              |         |
| Riboflavin   | 3.86 mg                                | 1.7/1.4 mg                                     | 5.6/5.26mg     | 1.6 mg                   | 1.3 mg  |
| Niacin       | 2.27 mg                                | 20/16 mg                                       | 22.27/18.27 mg | 1.6 mg/MJ                |         |
| Vitamin B12  | 9.08 ug                                | 6/2.5 ug                                       | 11.58 ug       | 1.4 ug                   | 1.4 ug  |
| Folate       | 113 ug                                 | 400/200 ug                                     | 513/313 ug     | 300 ug                   | 300 ug  |

RDA, recommended daily allowance;

PUFA, polyunsaturated fatty acids.

**Low calorie dietary regimen following food re-introduction in phase two/ three:**

| Meal                 | Food                                                                                                                                                                                                                                                                                                                                                                                                  | Kcals                             | Protein g                   |
|----------------------|-------------------------------------------------------------------------------------------------------------------------------------------------------------------------------------------------------------------------------------------------------------------------------------------------------------------------------------------------------------------------------------------------------|-----------------------------------|-----------------------------|
| <b>Breakfast</b>     | <ul style="list-style-type: none"> <li>• 2 slices of brown / white bread</li> <li>• 1 pat of Low Low</li> <li>• Tea / coffee (no sugar)</li> </ul>                                                                                                                                                                                                                                                    | 140<br>25                         | 4<br>0                      |
| <b>Mid-morning</b>   | <ul style="list-style-type: none"> <li>• 1 medium piece of fruit</li> </ul>                                                                                                                                                                                                                                                                                                                           | 40                                | 0                           |
| <b>Lunch</b>         | <ul style="list-style-type: none"> <li>• 1 scoop of mashed potato</li> <li>• 2 slices of meat / 1 breast of chicken (no breadcrumbs or batter) / 1 fillet of fish (~ 3oz)</li> <li>• 4 tablespoons veg of the day</li> <li>• 200ml low fat milk</li> <li>• 1 diet yoghurt</li> </ul>                                                                                                                  | 70<br>130 – 180<br>40<br>90<br>60 | 2<br>21 – 30<br>1<br>7<br>7 |
| <b>Mid-afternoon</b> | <ul style="list-style-type: none"> <li>• 1 medium piece of fruit</li> </ul>                                                                                                                                                                                                                                                                                                                           | 40                                | 0                           |
| <b>Tea</b>           | <ul style="list-style-type: none"> <li>• 2 slices of white / brown bread</li> <li>• 1 pat Low-Low</li> <li>• 1 small tin of tuna / 2 oz hard cheese / 2 slices of ham / 1 chicken breast / 2 boiled eggs</li> <li>• Heaped plate of lettuce / tomato / onion / sweetcorn / beetroot / mixed bean salad<br/>NO coleslaw/potato salad/mayonnaise/dressing</li> <li>• Tea / coffee (no sugar)</li> </ul> | 140<br>25<br>180 – 240<br>40      | 4<br>0<br>14 – 21<br>1 - 7  |
| <b>Before bed</b>    | <ul style="list-style-type: none"> <li>• 1 diet yoghurt</li> </ul>                                                                                                                                                                                                                                                                                                                                    | 60                                | 7                           |
| <b>Total</b>         |                                                                                                                                                                                                                                                                                                                                                                                                       | 1134                              | 75                          |
